# Supplementary material for: A Novel Interstitial Site in Binary Rock-Salt Compounds
Source: MDPI journal article supplement (doi:10.3390/ma15176015), 2022-08-31
Supplement: s1 [file s1]

## Supplementary Information

### A novel interstitial site in binary rock-salt compounds

Neeraj Mishra and Guy Makov

Dept. of Materials Engineering, Ben-Gurion University of the Negev, Beer Sheva

84105, Israel

| Materials | Defects               | Formation energy<br>(eV)<br>(3x3x3) | Formation energy<br>(eV)<br>(4x4x4) |
|-----------|-----------------------|-------------------------------------|-------------------------------------|
| KCl       | Cl- body interstitial | 1.74                                | 1.75                                |
|           | Cl- base interstitial | 1.32                                | 1.31                                |
|           | Split <111>           | 1.41                                | 1.40                                |
|           | Split <110>           | 1.32                                | 1.32                                |
| PbS       | S- body interstitial  | 3.01                                | 3.06                                |
|           | S- base interstitial  | 1.68                                | 1.69                                |
|           | S- vacancy            | 2.05                                | 2.05                                |
|           | Split <111>           | 1.45                                | 1.43                                |
|           | Split <110>           | 1.49                                | 1.52                                |
| AgBr      | Br- Split <111>       | 1.31                                | 1.36                                |

Table S1. Defect formation energy (eV) of selected defects with supercell size. The formation energies are converged to better than 0.05 eV with the supercell size.

| Materials | Defects               | Formation energy<br>(eV)<br>(3x3x3) |
|-----------|-----------------------|-------------------------------------|
| KCl       | K- body interstitial  | 0                                   |
|           | K- base interstitial  | 0.2                                 |
| KBr       | K- body interstitial  | 0                                   |
|           | K- base interstitial  | 0.2                                 |
| PbS       | Pb- body interstitial | 0                                   |
|           | Pb- base interstitial | 0.40                                |
| AgCl      | Ag- body interstitial | 0                                   |
|           | Ag- base interstitial | 0.06                                |

Table S2. Defect formation energy (eV) of cation interstitials in selected rock salt materials. Defect formation energy of the most stable interstitial configuration (body interstitial) is set to zero.

| Materials | Defects     | Most displaced atom | Displacements (Å) |
|-----------|-------------|---------------------|-------------------|
| PbS       | Body        | S                   | 0.40              |
|           | <b>Base</b> | Pb                  | 0.58              |
|           | Split <111> | Pb                  | 0.38              |
|           | Split <110> | Pb                  | 0.43              |
| PbSe      | Body        | Se                  | 0.37              |
|           | <b>Base</b> | Pb                  | 0.64              |
|           | Split <111> | Pb                  | 0.45              |
|           | Split <110> | Pb                  | 0.49              |
| CaS       | Body        | S                   | 0.36              |
|           | <b>Base</b> | Ca                  | 0.52              |
|           | Split <111> | Ca                  | 0.37              |
|           | Split <110> | Ca                  | 0.44              |
| MgSe      | Body        | Se                  | 0.54              |
|           | <b>Base</b> | Se                  | 0.63              |
|           | Split <111> | Mg                  | 0.52              |
|           | Split <110> | Mg                  | 0.53              |
| KCl       | Body        | Cl                  | 0.42              |
|           | <b>Base</b> | K                   | 0.61              |

|      |                          |    |      |
|------|--------------------------|----|------|
| KBr  | Split <111>              | K  | 0.32 |
|      | Split <110>              | K  | 0.50 |
|      | Body                     | Br | 0.48 |
|      | <b>Base</b>              | Br | 0.69 |
| AgCl | Split <111>              | K  | 0.37 |
|      | Split <110>              | K  | 0.54 |
|      | Body                     | Cl | 0.69 |
|      | Base                     | Cl | 0.99 |
| AgBr | Split <111>              | Cl | 1.02 |
|      | <b>Split &lt;110&gt;</b> | Ag | 1.20 |
|      | Body                     | Br | 0.71 |
|      | Base                     | Br | 0.98 |
|      | <b>Split &lt;111&gt;</b> | Br | 0.99 |
|      | Split <110>              | Ag | 0.83 |

Table S3. Displacement (in Å) of the nearest-neighboring atoms from their original positions in the defect-bearing supercells. The most displaced configuration in each system is marked in bold.
